# Supplementary material for: Intra- and Inter-Day Element Variability in Human Breast Milk: Pilot Study
Source: MDPI journal article supplement (doi:10.3390/toxics10030109), 2022-02-25
Supplement: s1 [file s1]

# Supplementary Materials: Intra- and Inter-Day Element Variability in Human Breast Milk: Pilot Study

Kenta Iwai, Miyuki Iwai-Shimada, Kaname Asato, Kunihiro Nakai, Yayoi Kobayashi, Shoji F. Nakayama and Nozomi Tatsuta

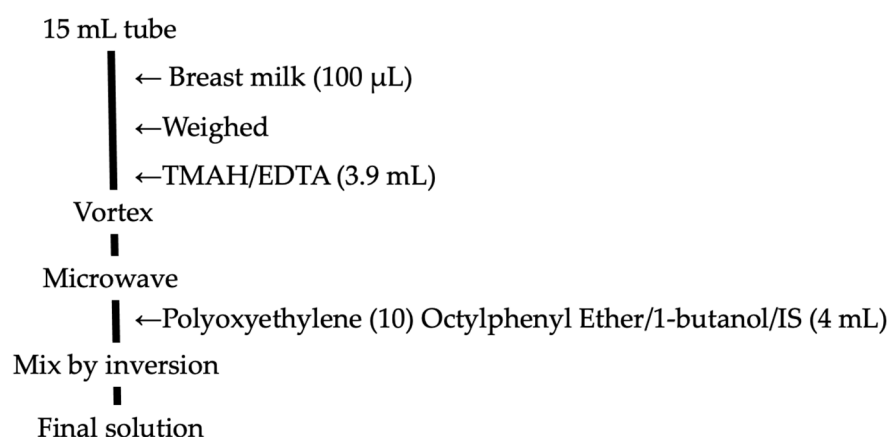

**Figure S1.** Pre-treatment procedures for ICP-MS analysis of breast milk samples. ICP-MS: inductively coupled plasma-mass spectroscopy, TMAH: tetramethyl ammonium hydroxide, IS: internal standard.

**Table S1.** Microwave conditions.

| Power (W)        | 600 |    |    |
|------------------|-----|----|----|
| Ramp time (min)  | 5   |    |    |
| Step             | 1   | 2  | 3  |
| Hold (min)       | 10  | 20 | 30 |
| Temperature (°C) | 60  | 70 | 80 |

**Table S2.** ICP-MS settings.

| Parameters                        | Setting                              |
|-----------------------------------|--------------------------------------|
| RF power                          | 1550 W                               |
| RF matching                       | 1.20 V                               |
| Sample/skimmer cone               | Nickel cones                         |
| Sampling position                 | 8.0 mm                               |
| Nebulizer gas                     | 1.08 L/min                           |
| Nebulizer uptake                  | Micromist concentric nebulizer       |
| Option gas                        | -                                    |
| Nebulizer pump                    | 0.10 rps                             |
| Spray chamber temperature         | 2°C                                  |
| Make up gas                       | -                                    |
| Aux. gas                          | 0.90 L/min                           |
| Plasma gas                        | 15.0 L/min                           |
| Collision gas flow rates (He gas) | L-He: 3.5 mL/min<br>H-He: 4.7 mL/min |

ICP-MS: inductively coupled plasma-mass spectroscopy, RF: radio frequency.

**Table S3.** Setting parameters for the ICP-MS method.

|    | Target mass | Gas mode | Integration time/mass | Internal standard elements |
|----|-------------|----------|-----------------------|----------------------------|
| Li | 7           | No gas   | 0.5                   | Y                          |
| Be | 9           | No gas   | 1                     | Y                          |
| Mg | 24          | L-He     | 0.03                  | Y                          |
| Ca | 43          | L-He     | 0.06                  | Y                          |
| V  | 51          | H-He     | 1                     | Y                          |
| Mn | 55          | H-He     | 0.1                   | Y                          |
| Fe | 56          | L-He     | 0.1                   | Y                          |
| Co | 59          | H-He     | 0.1                   | Y                          |
| Ni | 60          | L-He     | 0.1                   | Y                          |
| Cu | 63          | No gas   | 0.1                   | Y                          |
| Zn | 66          | No gas   | 0.5                   | Y                          |
| Ga | 69          | L-He     | 0.05                  | Y                          |
| As | 75          | H-He     | 0.5                   | Te                         |
| Se | 78          | L-He     | 0.1                   | Te                         |
| Br | 79          | No-gas   | 0.1                   | Y                          |
| Rb | 85          | No-gas   | 0.05                  | Y                          |
| Sr | 88          | No-gas   | 0.1                   | Y                          |
| Mo | 95          | No-gas   | 0.1                   | Y                          |
| Ag | 107         | H-He     | 0.5                   | Rh                         |
| Cd | 111         | L-He     | 0.1                   | In                         |
| Sb | 121         | L-He     | 0.1                   | In                         |
| Cs | 133         | H-He     | 0.1                   | In                         |
| Ba | 138         | L-He     | 1                     | In                         |
| W  | 182         | No-gas   | 0.1                   | Tl                         |
| Hg | 200         | No-gas   | 1                     | Tl                         |
| Pb | 208         | H-He     | 0.1                   | Tl                         |
| U  | 238         | H-He     | 0.1                   | Tl                         |
| Y  | 89          | No gas   | 0.01                  |                            |
| Tl | 205         | No gas   | 0.6                   |                            |
| Y  | 89          | L-He     | 0.01                  |                            |
| In | 115         | L-He     | 0.01                  |                            |
| Te | 125         | L-He     | 0.1                   |                            |
| Y  | 89          | H-He     | 0.01                  |                            |
| Rh | 103         | H-He     | 0.1                   |                            |
| In | 115         | H-He     | 0.01                  |                            |
| Te | 125         | H-He     | 0.01                  |                            |
| Tl | 205         | H-He     | 0.6                   |                            |

ICP-MS: inductively coupled plasma-mass spectroscopy.

Table S4. Intra-day variation of elements between fore- and hindmilk.

|    | Foremilk (ng/g)   |                     |                   | Hindmilk (ng/g)   |                     |                   |
|----|-------------------|---------------------|-------------------|-------------------|---------------------|-------------------|
|    | Morning<br>(N=11) | Afternoon<br>(N=11) | Evening<br>(N=11) | Morning<br>(N=11) | Afternoon<br>(N=11) | Evening<br>(N=11) |
| Li | 0.1               | 0.062               | 0.11              | 0.12              | 0.086               | 0.11              |
| Be | < 0.0082          | < 0.0082            | < 0.0082          | < 0.0082          | < 0.0082            | < 0.0082          |
| Mg | 34196             | 33938               | 31351             | 34679             | 33739               | 33712             |
| Ca | 297801            | 317211              | 325290            | 296616            | 308159              | 310641            |
| V  | < 0.068           | < 0.068             | 0.07              | < 0.068           | 0.087               | < 0.068           |

|    |         |         |         |         |         |         |
|----|---------|---------|---------|---------|---------|---------|
| Mn | 2.8     | 2.3     | 2.8     | 3.4     | 4.1     | 3.4     |
| Fe | 163     | 151     | 166     | 337     | 376     | 338     |
| Co | 0.057   | 0.059   | 0.072   | 0.065   | 0.083   | 0.068   |
| Ni | 3.4     | 4.1     | 3.5     | 3.9     | 3.8     | 3.8     |
| Cu | 233     | 243     | 209     | 266     | 260     | 234     |
| Zn | 1057    | 854     | 956     | 1031    | 1011    | 861     |
| As | 1.04    | 1.2     | 1.18    | 1.89    | 1.71    | 1.6     |
| Se | 14      | 16      | 15      | 16      | 19      | 17      |
| Br | 982     | 1082    | 1023    | 996     | 1071    | 1051    |
| Rb | 441     | 448     | 453     | 449     | 448     | 470     |
| Sr | 39      | 41      | 45      | 39      | 44      | 44      |
| Mo | 1       | 1       | 1.4     | 2.1     | 2.7     | 2.3     |
| Ag | 0.059   | 0.06    | 0.048   | 0.076   | 0.108   | 0.062   |
| Cd | 0.16    | 0.17    | 0.21    | 0.24    | 0.23    | 0.24    |
| Sb | < 0.049 | 0.075   | 0.095   | 0.063   | 0.065   | 0.07    |
| Cs | 1.4     | 1.5     | 1.4     | 1.4     | 1.4     | 1.5     |
| Ba | 1.6     | 1.7     | 1.7     | 1.7     | 2.3     | 1.9     |
| W  | < 0.054 | < 0.054 | < 0.054 | < 0.054 | < 0.054 | < 0.054 |
| Hg | 0.64    | 0.42    | 0.6     | 0.75    | 0.77    | 0.71    |
| Pb | 0.1     | 0.13    | 0.12    | 0.13    | 0.13    | 0.12    |
| U  | < 0.019 | < 0.019 | < 0.019 | < 0.019 | < 0.019 | < 0.019 |

Table S5. Intra-day variation of fat and protein contents between fore- and hindmilk.

|                 | Foremilk          |                     |                   | Hindmilk          |                     |                   |
|-----------------|-------------------|---------------------|-------------------|-------------------|---------------------|-------------------|
|                 | Morning<br>(N=11) | Afternoon<br>(N=11) | Evening<br>(N=11) | Morning<br>(N=11) | Afternoon<br>(N=11) | Evening<br>(N=11) |
| Fat (g/L)       | 47                | 35                  | 38                | 63                | 71                  | 71                |
| Protein (mg/mL) | 7.5               | 7.6                 | 7.1               | 8.4               | 8.2                 | 8.6               |
